# Supplementary material
Source: Elsevier journal article supplement (https://www.sciencedirect.com/science/article/pii/S2530064423000184)
Supplement: mmc1 [file S2530064423000184:mmc1.docx]

**SUPPORTING INFORMATION**

**Perspectives in Ecology and Conservation**

**How habitat loss and fragmentation are reducing conservation opportunities for vertebrates in the most threatened savanna of the World**

**João Paulo Santos Vieira-Alencar, Bruna E. Bolochio, Ana Paula Carmignotto, Ricardo J.**

**Sawaya, Luis Fábio Silveira, Paula Hanna Valdujo, Cristiano de Campos Nogueira & Javier Nori**

**Appendix S1:** MapBiomas land-use and land-cover (LULC) classification and respective binary reclassification codes. Data were obtained and processed on Google Earth Engine, and the complete reclassification algorithm is available at:

<https://code.earthengine.google.com/?scriptPath=users%2Fjoaosvalencar%2FJP%3APriority_Areas_2022>

| **Natural/Anthropic** | **Nomenclature** | **MapBiomas ID** | **Reclass Code** |
| --- | --- | --- | --- |
| Mosaic | **1. Forest** | **1** | 0 |
| Natural | 1.1. Natural Forest | **3** | 0 |
| Natural | 1.2. Savanna Formation | **4** | 0 |
| Natural | 1.3. Mangrove | **5** | 0 |
| Natural | 1.4. Wooded Restinga | **49** | 0 |
| Mosaic | **2. Non Forest Natural Formation** | **10** | 0 |
| Natural | 2.1. Wetland | **11** | 0 |
| Natural | 2.2. Grassland | **12** | 0 |
| Natural | 2.3. Salt Flat | **32** | 0 |
| Natural | 2.4. Rocky Outcrop | **29** | 0 |
| Natural | 2.5. Other non Forest Formations | **13** | 0 |
| Mosaic | **3. Farming** | **14** | 1 |
| Anthropic | 3.1. Pasture | **15** | 1 |
| Anthropic | 3.2. Agriculture | **18** | 1 |
| Anthropic | 3.2.1. Temporary Crop | **19** | 1 |
| Anthropic | 3.2.1.1. Soybean | **39** | 1 |
| Anthropic | 3.2.1.2. Sugar Cane | **20** | 1 |
| Anthropic | 3.2.1.3. Rice | **40** | 1 |
| Anthropic | 3.2.1.4. Other Temporary Crops | **41** | 1 |
| Anthropic | 3.2.2. Perennial Crop | **36** | 1 |
| Anthropic | 3.2.2.1. Coffee | **46** | 1 |
| Anthropic | 3.2.2.2. Citrus | **47** | 1 |
| Anthropic | 3.2.2.3. Other Perennial Crop | **48** | 1 |
| Anthropic | 3.3. Forest Plantation | **9** | 1 |
| Anthropic | 3.4 Mosaic Agriculture and Pasture | **21** | 1 |
| Mosaic | **4. Non-vegetated Area** | **22** | 1 |
| Natural | 4.1. Beach, Dune and Sand Spot | **23** | 0 |
| Anthropic | 4.2. Urban Area | **24** | 1 |
| Anthropic | 4.3. Mining | **30** | 1 |
| Mosaic | 4.4. Other non Vegetated Areas | **25** | 1 |
| Mosaic | **5. Water** | **26** | 1 |
| Mosaic | 5.1. River, Lake and Ocean | **33** | 1 |
| Anthropic | 5.2. Aquaculture | **31** | 1 |
| Non Identified | **6. Non-Observed** | **27** | 1 |
|  |  |  |  |
