# Supplementary material
Source: Elsevier journal article supplement (https://www.sciencedirect.com/science/article/pii/S2530064423000184)
Supplement: mmc3 [file S2530064423000184:mmc3.docx]

**SUPPORTING INFORMATION**

**Perspectives in Ecology and Conservation**

**How habitat loss and fragmentation are reducing conservation opportunities for vertebrates in the most threatened savanna of the World**

**João Paulo Santos Vieira-Alencar, Bruna E. Bolochio, Ana Paula Carmignotto, Ricardo J.**

**Sawaya, Luis Fábio Silveira, Paula Hanna Valdujo, Cristiano de Campos Nogueira & Javier Nori**

|  | Amphibians | | |  | Lizards | | |  | Snakes | | |  | Birds | | |  | Mammals | | |
| --- | --- | --- | --- | --- | --- | --- | --- | --- | --- | --- | --- | --- | --- | --- | --- | --- | --- | --- | --- |
|  | N | WG | WC |  | N | WG | WC |  | N | WG | WC |  | N | WG | WC |  | N | WG | WC |
| Least Concern | 41 | 0.33 | 0.28 |  | 34 | 0.52 | 0.23 |  | 36 | 0.56 | 0.24 |  | 20 | 0.45 | 0.14 |  | 16 | 0.41 | 0.11 |
| Near Threatened | 2 | 0.02 | 0.13 |  | 2 | 0.03 | 0.13 |  | 1 | 0.02 | 0.07 |  | 8 | 0.18 | 0.54 |  | 2 | 0.05 | 0.13 |
| Vulnerable | 0 | 0 | 0 |  | 2 | 0.03 | 0.12 |  | 5 | 0.08 | 0.29 |  | 9 | 0.2 | 0.53 |  | 1 | 0.03 | 0.06 |
| Endangered | 0 | 0 | 0 |  | 3 | 0.05 | 0.20 |  | 2 | 0.03 | 0.14 |  | 5 | 0.11 | 0.33 |  | 5 | 0.13 | 0.33 |
| Critically Endangered | 3 | 0.02 | 0.43 |  | 2 | 0.03 | 0.29 |  | 1 | 0.02 | 0.14 |  | 1 | 0.02 | 0.14 |  | 0 | 0 | 0 |
| Data Deficient | 36 | 0.29 | 0.57 |  | 10 | 0.15 | 0.16 |  | 8 | 0.13 | 0.13 |  | 0 | 0 | 0 |  | 7 | 0.18 | 0.14 |
| Non-assessed | 42 | 0.34 | 0.56 |  | 13 | 0.20 | 0.17 |  | 10 | 0.16 | 0.13 |  | 2 | 0.04 | 0.03 |  | 8 | 0.20 | 0.11 |

**Appendix S2**. Number of species of each terrestrial vertebrate group in each IUCN threat category. N = Absolute number; WG = percentages of each IUCN threat category within each terrestrial vertebrate group (column sum = 1); WC = percentages of each terrestrial vertebrate group within each IUCN threat category (WCs in one line sum = 1).
