# Supplementary material
Source: Elsevier journal article supplement (https://www.sciencedirect.com/science/article/pii/S2530064423000184)
Supplement: mmc4 [file S2530064423000184:mmc4.xlsx]

## Sheet: Table S2
SUPPORTING INFORMATION Perspectives in Ecology and Conservation How habitat loss and fragmentation are reducing conservation opportunities for vertebrates in the most threatened savanna of the world João Paulo S. Vieira-Alencar, Bruna E. Bolochio, Ana Paula Carmignotto, Ricardo J. Sawaya, Luis Fábio Silveira, Paula Hanna Valdujo, Cristiano de Campos Nogueira, & Javier Nori Appendix S4: Cerrado en…
	PAs	Top 17%	Top 30%
Average representation	21.47	43.56	56.18
Adenomera cotuba	15.9	28.4	59.3
Adenomera saci	26.3	43	57.2
Akodon kadiweu	45.7	67.9	77.5
Akodon lindberghi	44.4	57	62.6
Alectrurus tricolor	22.9	32.1	41.6
Alipiopsitta xanthops	12.4	22.7	38.6
Allobates brunneus	21.5	55.3	74.2
Allobates goianus	28	51.5	67.6
Alopoglossus collii	19.7	69.5	71.5
Ameerega berohoka	2.1	18	31
Ameerega braccata	57.7	77.3	84
Ameerega flavopicta	21.8	38	56.4
Ameerega picta	18.8	41.5	57.8
Ameiva jacuba	28.5	41.1	48.6
Ameiva parecis	4	77.6	80.7
Ameivula cipoensis	39.8	70.5	71
Ameivula jalapensis	37.1	59.4	94.3
Ameivula mumbuca	37.8	50.3	95
Ameivula xacriaba	21.4	33	78.6
Amphisbaena absaberi	5.5	66	66.5
Amphisbaena acrobeles	92.8	98.8	100
Amphisbaena anaemariae	26.2	34.4	44.2
Amphisbaena bedai	3.4	19.8	31.2
Amphisbaena brevis	15.2	67.5	74.3
Amphisbaena carli	14.3	36.9	67.2
Amphisbaena crisae	50.8	62.5	73.2
Amphisbaena cuiabana	32.4	43.9	61.9
Amphisbaena filiformis	3.7	42.6	77.2
Amphisbaena kraoh	50.5	61.6	78.6
Amphisbaena leeseri	1.7	14.6	27.6
Amphisbaena maranhensis	0.7	63.8	93.1
Amphisbaena mebengokre	0	24.9	26.8
Amphisbaena neglecta	67.1	81.8	86.7
Amphisbaena persephone	3.4	56	64.8
Amphisbaena sanctaeritae	8.2	21.8	21.9
Amphisbaena saxosa	55.4	86.9	88.8
Amphisbaena silvestrii	20.3	35.5	51.7
Amphisbaena steindachneri	7.7	65.2	65.9
Amphisbaena talisiae	38.1	52.3	65
Anolis meridionalis	20.6	39.8	53.4
Antilophia galeata	15.2	28.5	41.7
Aplastodiscus lutzorum	37.4	45.3	60.6
Apostolepis adhara	10.6	59.7	86.9
Apostolepis albicollaris	22.6	39.2	51
Apostolepis assimilis	10.3	21.7	29.7
Apostolepis barrioi	3.1	14.3	20.5
Apostolepis cerradoensis	27.7	78.3	83.2
Apostolepis christineae	10.9	77.3	80.2
Apostolepis flavotorquata	28.2	43.8	52.7
Apostolepis goiasensis	18.7	35	42.2
Apostolepis intermedia	16.4	28.3	43.5
Apostolepis kikoi	8	55	61.5
Apostolepis lineata	67.1	81.8	86.7
Apostolepis longicaudata	39.3	49.4	78.6
Apostolepis nelsonjorgei	59	75.9	85.4
Apostolepis phillipsae	14.9	55	55
Apostolepis polylepis	31.3	46.3	71.3
Apostolepis sanctaeritae	22.4	35.6	53.1
Apostolepis serrana	7	54.9	57.2
Apostolepis striata	21.7	72.1	73.1
Apostolepis tertulianobeui	26.3	52	63.2
Apostolepis vittata	31.3	69.2	74.9
Arremon flavirostris	8.4	19.8	30.8
Asthenes luizae	32.2	65.7	70.9
Atractus albuquerquei	14.4	36.9	45.5
Atractus edioi	18.2	76.3	86.7
Atractus pantostictus	16.8	35.6	48.7
Atractus spinalis	52	78.3	78.4
Atractus stygius	3.5	39.6	64.7
Augastes scutatus	20.2	54.5	65.9
Bachia bresslaui	34.4	47.2	57.7
Bachia cacerensis	11.2	57.8	58.2
Bachia didactyla	23.5	52.1	59.2
Bachia geralista	23.7	41.8	73.8
Bachia micromela	0	74.2	79.5
Bachia oxyrhina	67.5	67.8	92.6
Bachia psamophila	38.6	82.6	83.5
Barycholos ternetzi	12.9	31.2	52.6
Boana botumirim	11.2	66.9	87.7
Boana buriti	18.6	37.5	54
Boana caiapo	17.1	27.5	41.4
Boana cipoensis	18.8	53.7	70.6
Boana ericae	82.9	86.2	95.7
Boana goiana	33.9	41.9	61.5
Boana jaguariaivensis	47.2	61.4	63.9
Boana lundii	14.8	30.6	45.4
Boana stenocephala	1.6	25.7	26.1
Bokermannohyla alvarengai	22.5	57.9	71.3
Bokermannohyla ibitiguara	30.2	49.4	50.4
Bokermannohyla izecksohni	15.7	29.8	29.8
Bokermannohyla nanuzae	19.6	68.6	71.7
Bokermannohyla napolii	1.4	25.9	29
Bokermannohyla pseudopseudis	47.3	57.5	76.5
Bokermannohyla ravida	3.9	33	34.6
Bokermannohyla sagarana	4.6	55.4	58.4
Bokermannohyla sapiranga	27.6	38.6	54.9
Bokermannohyla saxicola	18.5	53.1	67.7
Bokermannohyla sazimai	8.2	28.1	32.3
Bothrops itapetiningae	10.7	19.5	25.9
Bothrops marmoratus	19.2	33.7	52.7
Bothrops moojeni	8.5	19	30.1
Bothrops pauloensis	7.8	18.3	24.9
Calassomys apicalis	9.4	62.2	69.9
Callithrix penicillata	18.8	31.3	42.5
Calomys tocantinsi	34.2	46.5	63.6
Carterodon sulcidens	27	52.5	62.4
Celeus obrieni	8.8	18.8	42.8
Cercomacra ferdinandi	26.5	40.9	69.2
Cerradomys akroai	14.7	52.2	87.5
Cerradomys marinhus	10.9	26.6	45.1
Cerradomys scotti	21.4	35.8	50.6
Charitospiza eucosma	15.8	27.8	44
Chiasmocleis albopunctata	14.1	35.9	52.8
Chiasmocleis centralis	4.6	37.4	41.5
Chironius brazili	20.2	38.2	49.1
Cinclodes espinhacensis	39.2	67.6	69.2
Clibanornis rectirostris	7.7	18.8	31.6
Clyomys laticeps	24.6	39.5	46.3
Coleodactylus brachystoma	18.5	40	65
Colobosaura modesta	21.9	40.8	57.1
Columbina cyanopis	10.2	41.1	53.5
Conothraupis mesoleuca	15.2	34.7	51.1
Coryphaspiza melanotis	13.4	25.8	38.2
Crossodactylus franciscanus	22.4	40.8	42.1
Crossodactylus trachystomus	17.7	58.7	66.1
Ctenomys bicolor	4.6	32.8	54
Ctenomys nattereri	9.9	49	64.1
Cyanocorax cristatellus	10.8	22	34.5
Dendropsophus anataliasiasi	12.3	26.6	46.1
Dendropsophus araguaya	2.1	35.2	40
Dendropsophus cerradensis	2.5	19.7	20.2
Dendropsophus cruzi	10.3	29.9	48.9
Dendropsophus elianeae	8.6	22	31.3
Dendropsophus jimi	9.9	22.3	31
Dendropsophus rhea	9.1	20.6	20.7
Dendropsophus rubicundulus	11.9	27.5	51.4
Dendropsophus tritaeniatus	17.8	32.7	50.3
Drymoluber brazili	10.5	23	31.5
Elachistocleis bumbameuboi	13.3	76.4	93.4
Elachistocleis matogrosso	12.5	25.7	51.7
Embernagra longicauda	12.6	40.9	60.8
Enyalius capetinga	36.4	43.9	67.3
Epicrates crassus	12	23.7	36.5
Epictia clinorostris	6.7	28.6	42.1
Erythrolamprus maryellenae	40.9	55	66.2
Eurolophosaurus nanuzae	25.9	68.2	70.9
Euryoryzomys lamia	23.7	37.8	57.1
Euscarthmus rufomarginatus	19.6	29.2	51.1
Galea flavidens	26	40.8	55.6
Geositta poeciloptera	23.7	34.1	46.3
Gyldenstolpia planaltensis	58.8	71.2	77.6
Gymnodactylus amarali	19	36.3	61.2
Gymnodactylus guttulatus	15.5	87	88.3
Helicops boitata	6.5	43.4	44.8
Helicops gomesi	7	12.1	18.4
Helicops phantasma	24.9	47.3	71.5
Herpsilochmus longirostris	6.9	15.6	26.5
Heterodactylus lundii	25.2	54	56.4
Holochilus sciureus	14.7	33.4	52.1
Hoplocercus spinosus	19.9	36.1	48.4
Hydropsalis candicans	9.2	22.2	32.7
Hylodes otavioi	36.5	68.2	68.5
Ischnocnema penaxavantinho	0.8	25.1	31.8
Kentropyx paulensis	25.3	38.2	48.3
Kentropyx vanzoi	18.5	48.7	59.4
Kerodon acrobata	8.8	40.3	59
Knipolegus franciscanus	12.6	26.6	48.7
Kunsia tomentosus	24.3	60.6	62.7
Laterallus xenopterus	11.1	19.4	35.8
Leposternon cerradensis	3.1	19.8	20
Leposternon maximus	38.7	48.3	75.3
Leposternon mineiro	0	30.3	41.6
Leptodactylus brevipes	15.9	29.6	52.9
Leptodactylus camaquara	22.7	59.2	78.2
Leptodactylus cunicularius	27.2	67.3	68.8
Leptodactylus furnarius	17.4	39.5	48.4
Leptodactylus kilombo	0.8	31.4	48.7
Leptodactylus pustulatus	8.8	26.5	48.2
Leptodactylus sertanejo	28.1	44.4	59.9
Leptodactylus tapiti	84.2	87.5	93.8
Liotyphlops schubarti	3.8	23.7	24.2
Liotyphlops taylori	10.9	77.3	80.2
Lonchophylla bokermanni	43.2	81.5	81.8
Lonchophylla dekeyseri	38.3	47.5	61.4
Lycalopex vetulus	18.2	32.4	45
Lygophis paucidens	36.1	49.3	67.8
Lysapsus caraya	29.8	39.9	57.1
Manciola guaporicola	32.1	50.8	61.2
Melanopareia torquata	19.4	33.4	47.2
Micrablepharus atticolus	19.4	38.3	51.2
Microakodontomys transitorius	59.7	68.3	73.6
Micrurus brasiliensis	32.7	48.5	68.5
Micrurus tricolor	7.8	18	39.3
Monodelphis kunsi	15.4	34.5	48.5
Monodelphis sanctaerosae	10.4	61.3	68.2
Myiothlypis leucophrys	17.6	27.7	39.4
Neothraupis fasciata	18.4	31	46.6
Nothura minor	22.2	33.9	41
Nyctiprogne vielliardi	5.9	30.5	45.2
Nystalus striatipectus	3.1	11.4	27.8
Odontophrynus cultripes	13.6	28.6	40.1
Odontophrynus juquinha	17	57.8	68.4
Odontophrynus monachus	31.8	50.9	51.6
Oecomys cleberi	15.5	26.2	36.9
Oligoryzomys moojeni	25.5	42.9	72.8
Oligoryzomys rupestris	79.9	91.1	91.4
Oreobates antrum	18.7	40.7	53.6
Oreobates heterodactylus	24.8	52.5	73.7
Oreobates remotus	50.6	78.8	88
Oxymycterus delator	39.2	51.1	63.4
Oxymycterus itapeby	46.6	60.6	63.2
Paroaria baeri	25.7	33.7	48.3
Penelope ochrogaster	14.7	28.9	50.3
Phaethornis nattereri	12.8	26.4	42.2
Phalotris cerradensis	37.9	64.7	87.3
Phalotris concolor	1.8	39.5	56.2
Phalotris labiomaculatus	25.6	52.1	83.2
Phalotris lativittatus	5.7	16.9	21
Phalotris matogrossensis	4.9	18.2	29.5
Phalotris mertensi	5.8	13.6	18.8
Phalotris multipunctatus	13.6	28.2	28.8
Phalotris nasutus	14	24.8	33.7
Phasmahyla jandaia	19	53	66.2
Philodryas livida	16.7	30.4	35.7
Philodryas mattogrossensis	2.4	14.9	22.6
Phyllomyias reiseri	16	30	49.7
Phyllomys brasiliensis	6.2	38	41.5
Phyllomys centralis	45.7	64.9	66.3
Phylloscartes roquettei	7.2	21.9	44.1
Physalaemus atim	13.1	33.1	34.7
Physalaemus centralis	12.8	28.8	45.8
Physalaemus claptoni	42.5	75.2	75.4
Physalaemus deimaticus	27.9	68.7	69
Physalaemus evangelistai	23.9	71.1	74.3
Physalaemus marmoratus	11.2	25.9	39.6
Physalaemus nattereri	7.8	21.3	36.6
Pithecopus araguaius	23.6	41.8	67
Pithecopus ayeaye	18.3	38.3	42.3
Pithecopus azureus	12.9	31.9	53.8
Pithecopus centralis	41.2	67.1	76.4
Pithecopus megacephalus	22.4	60.7	74.1
Pithecopus oreades	59	69.3	77.9
Placosoma cipoense	49	76.7	76.7
Polystictus superciliaris	18.3	45.4	58.1
Poospiza cinerea	17.2	35.2	50.2
Porphyrospiza caerulescens	16.5	31.4	49.6
Pristimantis dundeei	21.9	38.8	56.3
Pristimantis moa	7.1	30.2	77.8
Pristimantis ventrigranulosus	5.3	28.9	36.5
Proceratophrys bagnoi	18.8	57.3	79.5
Proceratophrys branti	22.9	41.5	68.3
Proceratophrys carranca	0	35	39.1
Proceratophrys cururu	34.9	73.2	75.1
Proceratophrys dibernardoi	1	17.7	28.5
Proceratophrys goyana	18.7	33.5	57.6
Proceratophrys huntingtoni	14.5	47.6	62.8
Proceratophrys moratoi	8.3	18.8	25.5
Proceratophrys rotundipalpebra	84.6	87.3	95.2
Proceratophrys salvatori	44.6	52.5	66.4
Proceratophrys strussmannae	3.4	69.2	79.1
Proceratophrys vielliardi	26.5	34.6	51.8
Pseudis tocantins	10.5	24.9	51.5
Pseudopaludicola atragula	1.8	15.8	16.6
Pseudopaludicola coracoralinae	2.8	23.5	24.8
Pseudopaludicola facureae	0.5	10.8	16.6
Pseudopaludicola ibisoroca	2	29.8	35.9
Pseudopaludicola jazmynmcdonaldae	56.4	85.7	87.7
Pseudopaludicola mineira	25.3	66.2	67.3
Pseudopaludicola ternetzi	18.2	30	44.5
Psilops seductus	22.9	57	76.6
Pyrrhura pfrimeri	15.8	38.8	52.6
Rhachidelus brazili	8.7	17.1	25.6
Rhachisaurus brachylepis	22.7	59.5	72
Rhinella cerradensis	16.2	25.8	56.4
Rhinella inopina	21.1	43.3	64.7
Rhinella ocellata	24.5	40.6	56.8
Rhinella rubescens	20	38.7	52.1
Rhinella scitula	14.9	33.8	49.4
Rhinella sebbeni	16.5	29.7	42.5
Rhinella veredas	7.7	16.8	63.2
Rhipidomys ipukensis	18.3	42.7	68.3
Rhipidomys macrurus	26.6	38.4	54.5
Saltatricula atricollis	10.8	22.1	36.7
Salvator duseni	46.7	56.8	69.7
Scinax cabralensis	6.6	52.1	52.8
Scinax canastrensis	12.5	30.2	36.1
Scinax centralis	7.3	22.2	34.9
Scinax constrictus	11.7	23.9	40.2
Scinax curicica	25.3	67.4	76.7
Scinax goya	23.3	57.7	73.6
Scinax haddadorum	3.1	31.6	43.5
Scinax machadoi	15.3	54.9	73.7
Scinax maracaya	26.7	46.8	48.3
Scinax pinimus	29.7	63.7	64.1
Scinax pombali	25.7	45.1	47.8
Scinax rogerioi	57.9	62.3	67.4
Scinax rossaferesae	35.8	48.2	56.7
Scinax rupestris	78.6	83.9	96.2
Scinax skaios	22.4	32	55
Scinax tigrinus	18.4	31.4	49.6
Scytalopus novacapitalis	22.1	34.3	43.7
Siagonodon acutirostris	59.8	60.4	87.8
Simophis rhinostoma	7.4	16.2	23
Sporophila nigrorufa	7.8	41.8	42.8
Stenocercus albolineatus	6.1	40.8	52.4
Stenocercus canastra	37.5	56.7	57
Stenocercus quinarius	31.9	42.7	74.3
Stenocercus sinesaccus	18.2	45.9	54.2
Suiriri affinis	27.8	37.8	54.2
Synallaxis simoni	11.5	22.4	39.4
Syndactyla dimidiata	23.7	34	46.7
Taoniscus nanus	32.4	41.4	51.7
Thalpomys cerradensis	34.5	56.3	71.4
Thalpomys lasiotis	54.7	68.4	74.3
Thamnodynastes rutilus	28.7	35.3	47.4
Thoropa megatympanum	21.6	57.7	72.3
Thrichomys apereoides	9.1	27.6	50.4
Thrichomys pachyurus	33.1	44.7	63.7
Thylamys velutinus	45.1	58	61
Trachycephalus mambaiensis	25.3	39.3	56.7
Trilepida brasiliensis	14.9	35.5	59.4
Trilepida fuliginosa	12.4	23.4	47
Trilepida jani	14.5	38.6	62.2
Trilepida koppesi	9.4	19.9	29.7
Trinomys moojeni	33.3	68	68.4
Tropidophis preciosus	1	52.4	53.7
Tropidurus callathelys	20.5	54.3	54.5
Tropidurus chromatops	16.1	57	57.4
Tropidurus itambere	15.1	28.2	40.6
Tropidurus montanus	13.4	51.4	62.7
Tropidurus oreadicus	14.8	32.6	51.9
Tupinambis matipu	23.8	48	60.6
Tupinambis quadrilineatus	15.3	27.5	50.4
Uropelia campestris	17.3	30.1	48.6
Vanzosaura savanicola	30	39.7	72.3
Xenodon matogrossensis	6.2	21.3	35.7
Xenodon nattereri	10.8	19.3	28.6
